# Supplementary material for: Porous polydopamine nanospheres with yolk shell-like structure to effectively remove methylene blue, bisphenol A, and tetracycline from wastewaters
Source: Royal Society of Chemistry journal article supplement (doi:10.1039/d2nj05587b), 2022-12-26
Supplement: d2nj05587b1.pdf [file d2nj05587b1.pdf]

# Porous polydopamine nanospheres with yolk shell-like structure to effectively remove methylene blue, bisphenol A, and tetracycline from wastewaters

Haibo Wang<sup>1#</sup>, Wentao Dong<sup>2#</sup>, Zhiwei Gao<sup>3</sup>, Ziqi Shi<sup>2</sup>, Yifan Zhou<sup>2</sup>, Xi Lu<sup>1,\*</sup>, Bin Yan<sup>2,\*</sup>

<sup>1</sup> Oil Production Engineering Division, Sinopec Petroleum Exploration, and Production Research Institute, Beijing, China 100083

<sup>2</sup> National Engineering Laboratory for Clean Technology of Leather Manufacture, College of Biomass Science and Engineering, Sichuan University, Chengdu 610065, China

<sup>3</sup> Xinjiang Xinchun Petroleum Development Co., Ltd., Sinopec, Dongying, Shandong 257000, China

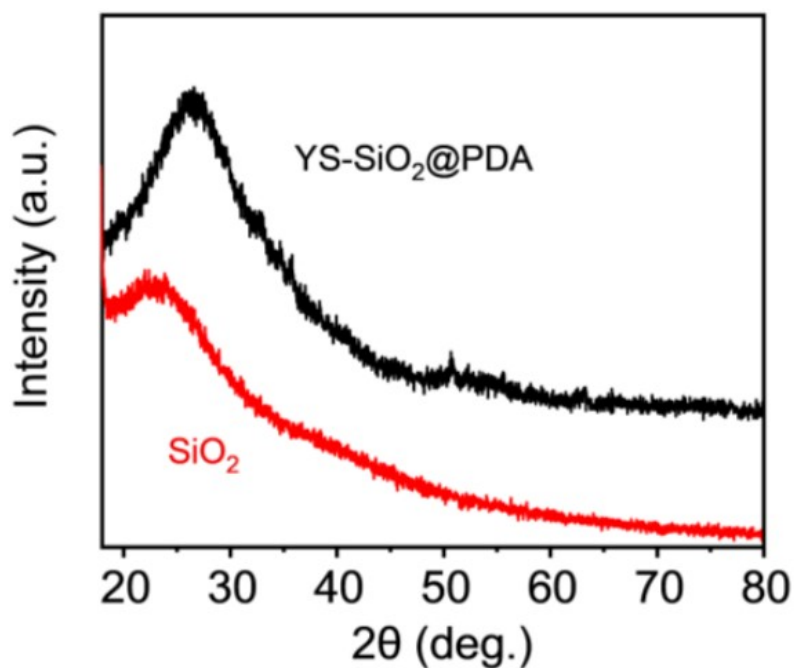

Fig. S1 XRD pattern of SiO<sub>2</sub> and YS-SiO<sub>2</sub>@PDA.

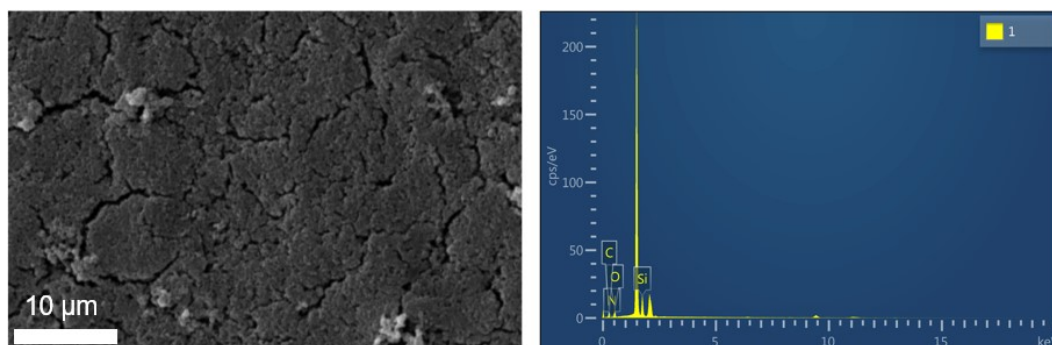

Fig. S2 EDS patterns of YS-SiO<sub>2</sub>@PDA nanospheres.

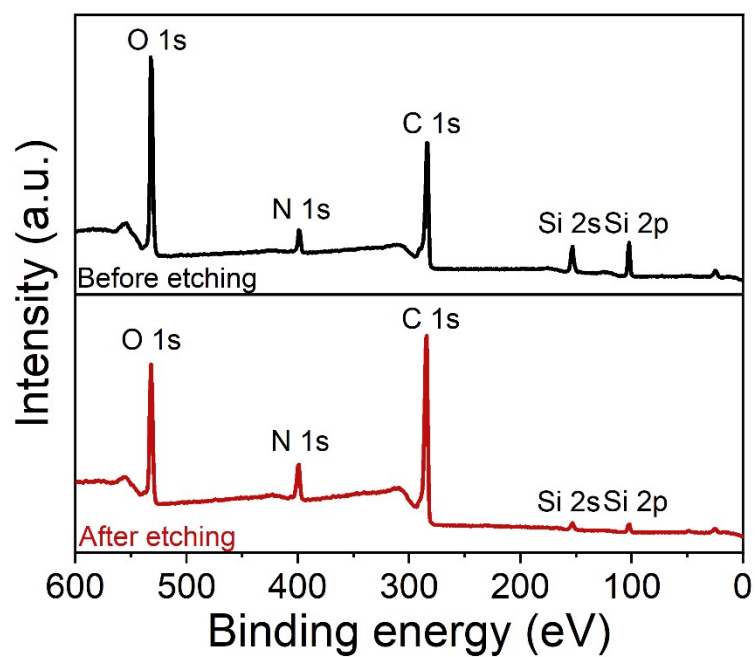

Fig. S3 XPS spectra of nanospheres before and after etching.

Table S1 XPS spectra element content analysis of nanospheres before etching.

| Element | Pos.   | At%   |
|---------|--------|-------|
| C 1s    | 284.08 | 58.27 |
| N 1s    | 400.08 | 5.16  |
| Si 2p   | 103.08 | 8.95  |
| O 1s    | 553.08 | 27.61 |

Table S2 XPS spectra element content analysis of nanospheres after etching.

| Element | Pos.   | At%   |
|---------|--------|-------|
| C 1s    | 284.08 | 72.26 |
| N 1s    | 400.08 | 7.94  |
| Si 2p   | 103.08 | 2.08  |
| O 1s    | 553.08 | 17.72 |

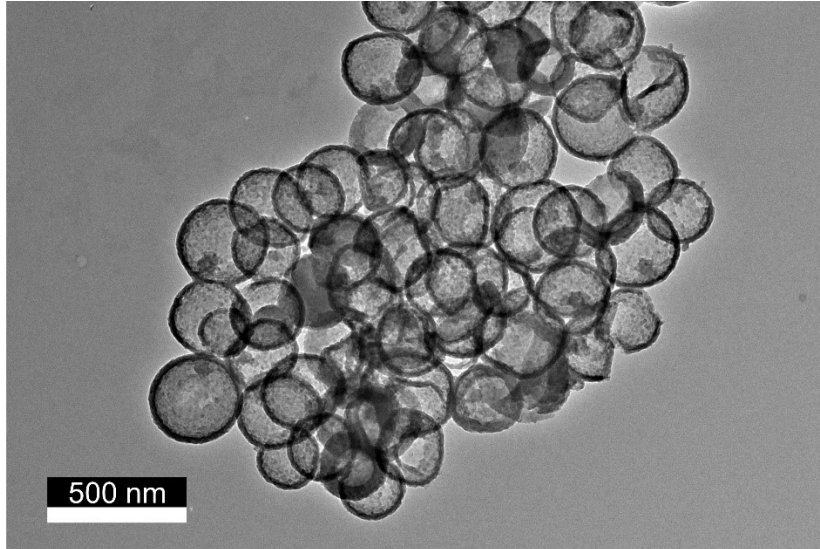

Fig. S4 Low magnification TEM image of YS-SiO<sub>2</sub>@PDA nanospheres.

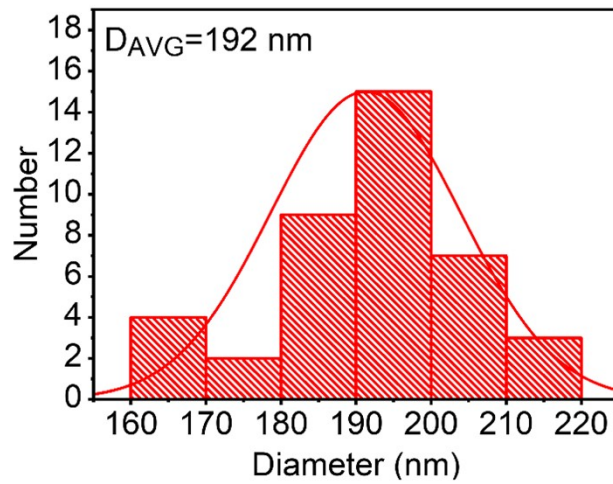

Fig. S5 Diameter distribution of SiO<sub>2</sub> nanospheres.

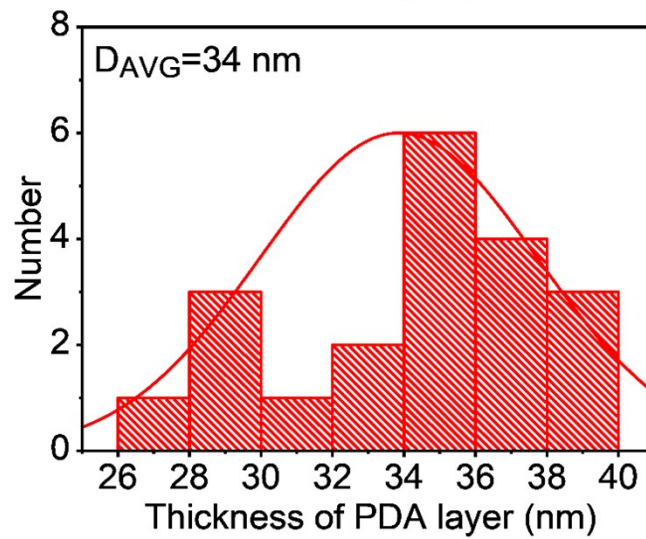

Fig. S6 PDA shell layer thickness distribution of YS-SiO<sub>2</sub>@PDA nanospheres.

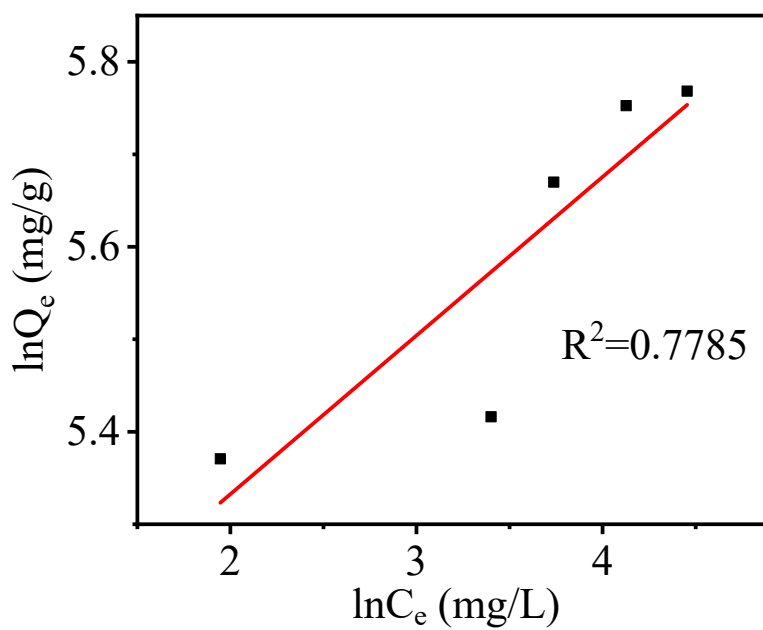

Fig. S7 Freundlich linear fitting model of MB adsorption by YS-SiO<sub>2</sub>@PDA nanospheres.

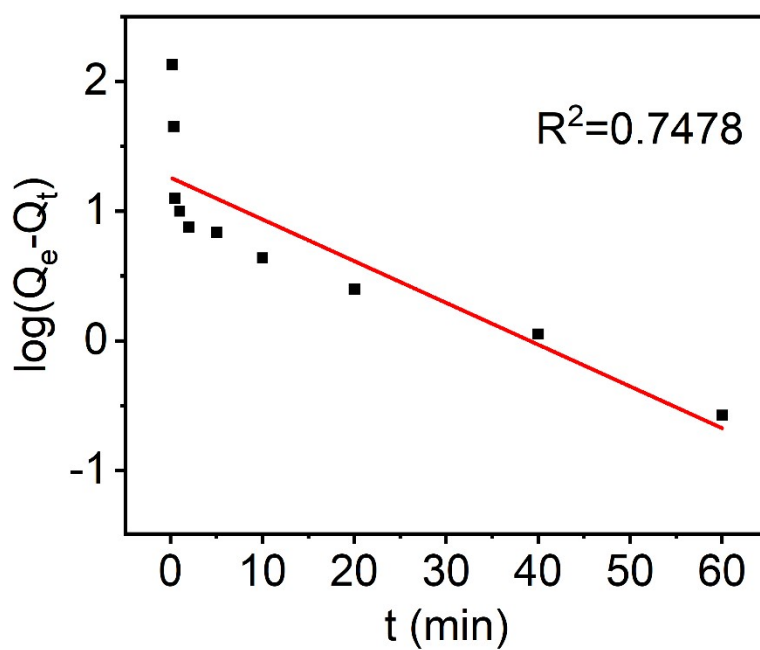

Fig. S8 Pseudo-first-order kinetic model of MB adsorption by YS-SiO<sub>2</sub>@PDA nanospheres.

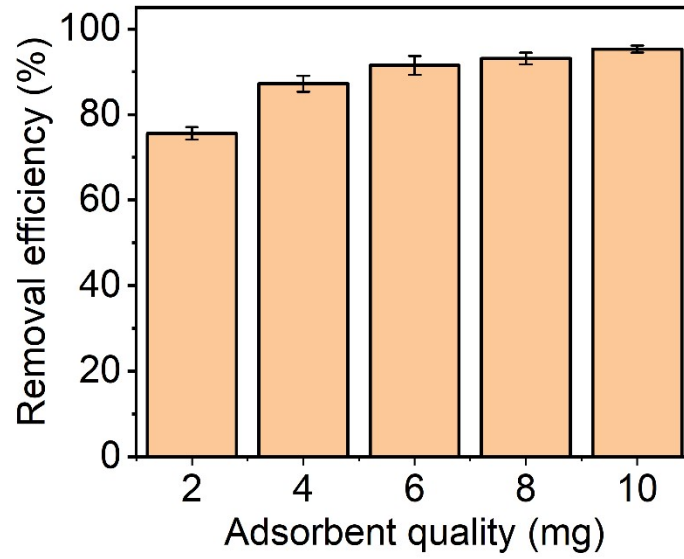

Fig. S9 Effect of YS-SiO<sub>2</sub>@PDA dosing levels on adsorption of BPA.

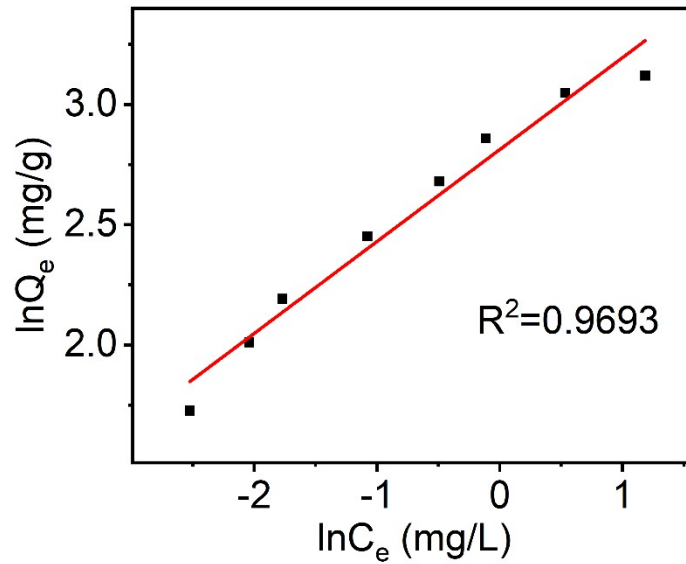

Fig. S10 Freundlich linear fitting model of BPA adsorption by YS-SiO<sub>2</sub>@PDA nanospheres.

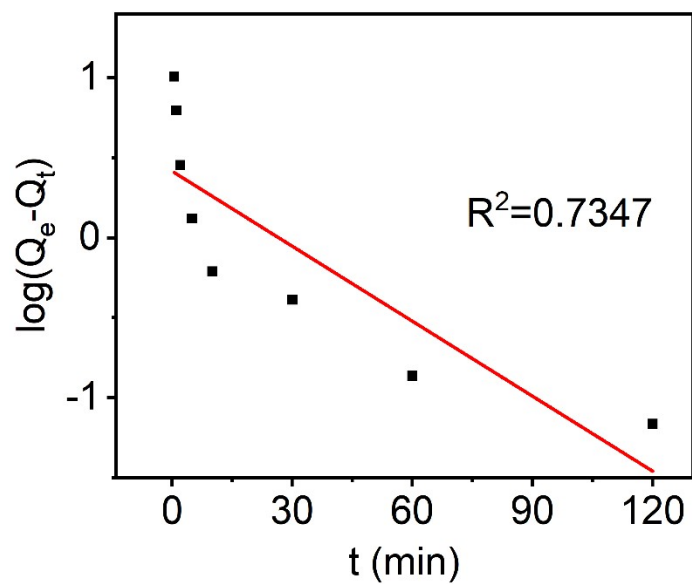

Fig. S11 Pseudo-first-order kinetic model of BPA adsorption by YS-SiO<sub>2</sub>@PDA nanospheres.

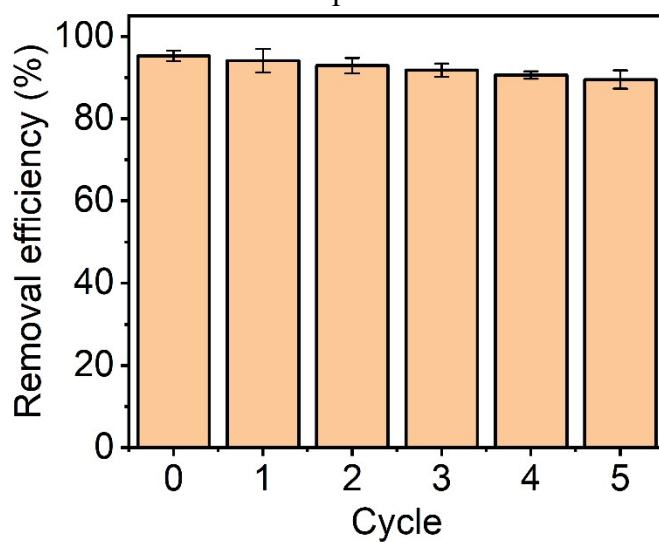

Fig. S12 Recyclability of YS-SiO<sub>2</sub>@PDA nanospheres for BPA.

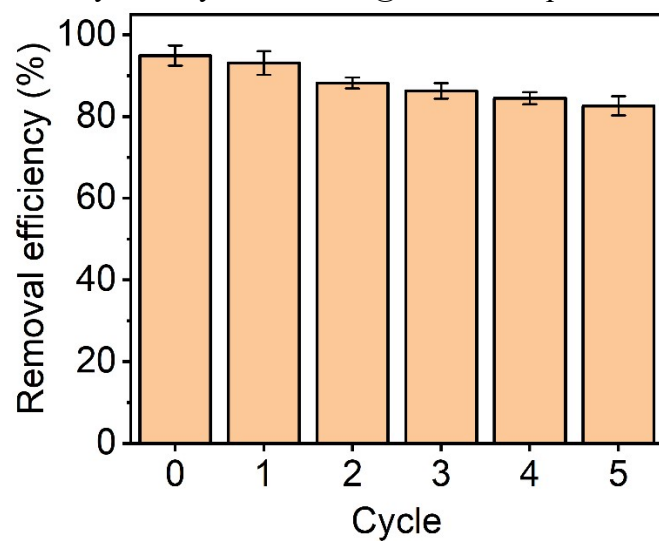

Fig. S13 Recyclability of YS-SiO<sub>2</sub>@PDA nanospheres for TC.

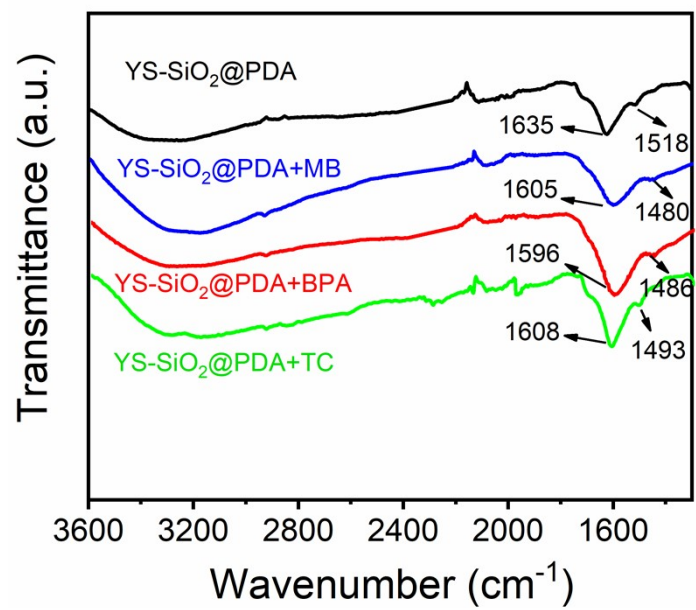

Fig. S14 FTIR spectra of YS-SiO<sub>2</sub>@PDA nanospheres and nanospheres after adsorption of MB, BPA, and TC.
